# Supplementary material
Source: PubMed Central journal article supplement (PMC5165125)
Supplement: AEM.02305-16_zam999117588s1.pdf [file AEM.02305-16_zam999117588s1.pdf]

**Supplementary table 1:** List of *Helicobacter* strains used in this study

| <b>S. No.</b> | <b><i>Helicobacter</i> species</b>         | <b>Accession ID</b> |
|---------------|--------------------------------------------|---------------------|
| 1             | <i>Helicobacter acinonychis</i> Sheeba     | NC_008229           |
| 2             | <i>Helicobacter bizzozeronii</i> CIII-1    | NC_015674           |
| 3             | <i>Helicobacter canadensis</i> MIT 98-5491 | NZ_CM000776         |
| 4             | <i>Helicobacter bilis</i> ATCC 43879       | ACDN00000000        |
| 5             | <i>Helicobacter pylori</i> 26695           | NC_000915           |
| 6             | <i>Helicobacter cetorum</i> MIT 00-7128    | NC_017737           |
| 7             | <i>Helicobacter canis</i> NCTC 12740       | NZ_AZJJ00000000     |
| 8             | <i>Helicobacter fennelliae</i> MRY12-0050  | NZ_BASD00000000     |
| 9             | <i>Helicobacter rodentium</i> ATCC 700285  | NZ_JHWC00000000     |
| 10            | <i>Helicobacter cinaedi</i> ATCC BAA-847   | NC_020555           |
| 11            | <i>Helicobacter felis</i> ATCC 49179       | NC_014810           |
| 12            | <i>Helicobacter heilmanii</i> ASB1.4       | HE984298            |
| 13            | <i>Helicobacter hepaticus</i> ATCC 51449   | NC_004917           |
| 14            | <i>Helicobacter mustelae</i> 12198         | NC_013949           |
| 15            | <i>Helicobacter macacae</i> MIT 99-5501    | AZJI01000000        |
| 16            | <i>Helicobacter suis</i> HSI               | ADGY00000000        |
| 17            | <i>Helicobacter trogontum</i> ATCC 700-114 | JRPL00000000        |
| 18            | <i>Helicobacter pullorum</i> MIT 98-5489   | ABQU00000000        |
| 19            | <i>Helicobacter pullorum</i> 229254/12     | JNOA00000000        |
| 20            | <i>Helicobacter pullorum</i> 229336/12     | JNUR00000000        |
| 21            | <i>Helicobacter pullorum</i> 229334/12     | JNOC00000000        |
| 22            | <i>Helicobacter pullorum</i> 229313/12     | JNOB00000000        |
| 23            | <i>Helicobacter pullorum</i> NAP1W4        | LXWI00000000        |
| 24            | <i>Helicobacter pullorum</i> NAP2W5        | MAPE00000000        |
| 25            | <i>Helicobacter pullorum</i> NAP3W17       | MAPD00000000        |
| 26            | <i>Helicobacter pullorum</i> NAP5W19       | MAPC00000000        |
| 27            | <i>Helicobacter pullorum</i> NAP6W24       | MAPB00000000        |
| 28            | <i>Helicobacter pullorum</i> NAP8W25       | MAPA00000000        |
| 29            | <i>Helicobacter pullorum</i> NAP10B8       | MAOZ00000000        |
| 30            | <i>Helicobacter pullorum</i> NAP11B31      | MAJF00000000        |
| 31            | <i>Helicobacter pullorum</i> NAP12B32      | MAJG00000000        |
| 32            | <i>Helicobacter pullorum</i> NAP13B35      | MANJ00000000        |
| 33            | <i>Helicobacter pullorum</i> NAP14B36      | MANK00000000        |
| 34            | <i>Wolinella succinogenes</i> DSM 1740     | NC_005090           |
| 35            | <i>Campylobacter jejuni</i> NCTC 11168     | NC_002163           |

**Supplementary table 2:** In *silico* screening of antimicrobial resistance genes in 11 whole genome sequences of *H. pullorum* isolates from India, as reported in the CARD database (+ presence, - absence).

| Strains  | antimicrobial resistance genes |                                        |             |                    |                               |                     |
|----------|--------------------------------|----------------------------------------|-------------|--------------------|-------------------------------|---------------------|
|          | <i>tufA</i>                    | Fluoroquinolone resistant DNA gyrase A | <i>cmeB</i> | <i>APH(3'')-Ib</i> | <i>AAC(6')-Ie-APH(2'')-Ia</i> | <i>APH(3')-IIIa</i> |
| NAP1W4   | +                              | +                                      | +           | +                  | -                             | -                   |
| NAP2W5   | +                              | +                                      | +           | +                  | -                             | -                   |
| NAP3W17  | +                              | +                                      | +           | +                  | -                             | -                   |
| NAP5W19  | +                              | +                                      | +           | +                  | -                             | +                   |
| NAP6W24  | +                              | +                                      | +           | +                  | -                             | +                   |
| NAP8W25  | +                              | +                                      | +           | -                  | -                             | -                   |
| NAP10B8  | +                              | +                                      | +           | +                  | -                             | -                   |
| NAP11B31 | +                              | +                                      | +           | +                  | +                             | -                   |
| NAP12B32 | +                              | +                                      | +           | +                  | +                             | -                   |
| NAP13B35 | +                              | +                                      | +           | +                  | +                             | -                   |
| NAP14B36 | +                              | +                                      | +           | +                  | +                             | -                   |

**Supplementary table 3:** Status of major virulence factors as reported from the VFDB database of *Campylobacter jejuni* in the sequenced genomes of 11 *H. pullorum* strains from India (+ presence, - absence).

| Genes         | NAP1<br>W4 | NAP<br>2W5 | NAP<br>3W17 | NAP<br>5W1<br>9 | NAP<br>6W24 | NAP<br>8W25 | NAP<br>10B<br>8 | NAP<br>11B<br>31 | NAP<br>12B<br>32 | NAP<br>13B3<br>5 | NAP<br>14B3<br>6 |
|---------------|------------|------------|-------------|-----------------|-------------|-------------|-----------------|------------------|------------------|------------------|------------------|
| <i>fliM</i>   | +          | +          | +           | +               | +           | +           | +               | +                | +                | +                | +                |
| <i>fliA</i>   | +          | +          | +           | +               | +           | +           | +               | +                | +                | +                | +                |
| <i>fliG</i>   | +          | +          | +           | +               | +           | +           | +               | +                | +                | +                | +                |
| <i>fliN</i>   | +          | +          | +           | +               | +           | +           | +               | +                | +                | +                | +                |
| <i>fliE</i>   | +          | +          | +           | +               | +           | +           | +               | +                | +                | +                | +                |
| <i>flgC</i>   | +          | +          | +           | +               | +           | +           | +               | +                | +                | +                | +                |
| <i>fliS</i>   | +          | +          | +           | +               | +           | +           | +               | +                | +                | +                | +                |
| <i>flgH</i>   | +          | +          | +           | +               | +           | +           | +               | +                | +                | +                | +                |
| <i>flgG</i>   | +          | +          | +           | +               | +           | +           | +               | +                | +                | +                | +                |
| <i>fliP</i>   | +          | +          | +           | +               | +           | +           | +               | +                | +                | +                | +                |
| <i>flhA</i>   | +          | +          | +           | +               | +           | +           | +               | +                | +                | +                | +                |
| <i>flgI</i>   | +          | +          | +           | +               | +           | +           | +               | +                | +                | +                | +                |
| <i>fliQ</i>   | +          | +          | +           | +               | +           | +           | +               | +                | +                | +                | +                |
| <i>cdtB</i>   | +          | +          | +           | +               | +           | +           | +               | +                | +                | +                | +                |
| <i>gmhA2</i>  | +          | +          | +           | +               | +           | +           | +               | +                | +                | +                | +                |
| <i>kpsF</i>   | +          | +          | +           | +               | +           | +           | +               | +                | +                | +                | +                |
| <i>kpsD</i>   | +          | +          | +           | +               | +           | +           | +               | +                | +                | +                | +                |
| <i>kpsE</i>   | +          | +          | +           | +               | +           | +           | +               | +                | +                | +                | +                |
| <i>kpsT</i>   | +          | +          | +           | +               | +           | +           | +               | +                | +                | +                | +                |
| <i>gmhA</i>   | +          | +          | +           | +               | +           | +           | +               | +                | +                | +                | +                |
| <i>hldD</i>   | +          | +          | +           | +               | +           | +           | +               | +                | +                | +                | +                |
| <i>flgR</i>   | +          | +          | +           | +               | +           | +           | +               | +                | +                | +                | +                |
| <i>pseB</i>   | +          | +          | +           | +               | +           | +           | +               | +                | +                | +                | +                |
| <i>cheW</i>   | +          | +          | +           | +               | +           | +           | +               | +                | +                | +                | +                |
| <i>cheA</i>   | +          | +          | +           | +               | +           | +           | +               | +                | +                | +                | +                |
| <i>cheV</i>   | +          | +          | +           | +               | +           | +           | +               | +                | +                | +                | +                |
| <i>cheY</i>   | +          | +          | +           | +               | +           | +           | +               | +                | +                | +                | +                |
| <i>gmhA-2</i> | +          | +          | +           | +               | +           | +           | +               | +                | +                | +                | +                |
| <i>kpsF</i>   | +          | +          | +           | +               | +           | +           | +               | +                | +                | +                | +                |
| <i>kpsD</i>   | +          | +          | +           | +               | +           | +           | +               | +                | +                | +                | +                |
| <i>kpsE</i>   | +          | +          | +           | +               | +           | +           | +               | +                | +                | +                | +                |
| <i>kpsT</i>   | +          | +          | +           | +               | +           | +           | +               | +                | +                | +                | +                |
| <i>kpsF</i>   | +          | +          | +           | +               | +           | +           | +               | +                | +                | +                | +                |
| <i>kpsD</i>   | +          | +          | +           | +               | +           | +           | +               | +                | +                | +                | +                |
| <i>gmhA-1</i> | +          | +          | +           | +               | +           | +           | +               | +                | +                | +                | +                |
| <i>waaD</i>   | +          | +          | +           | +               | +           | +           | +               | +                | +                | +                | +                |
| <i>gmhA-1</i> | +          | +          | +           | +               | +           | +           | +               | +                | +                | +                | +                |

|               |   |   |   |   |   |   |   |   |   |   |   |   |
|---------------|---|---|---|---|---|---|---|---|---|---|---|---|
| <i>waaD</i>   | + | + | + | + | + | + | + | + | + | + | + | + |
| <i>fliA</i>   | + | + | + | + | + | + | + | + | + | + | + | + |
| <i>fliE</i>   | + | + | + | + | + | + | + | + | + | + | + | + |
| <i>flgC</i>   | + | + | + | + | + | + | + | + | + | + | + | + |
| <i>flgC</i>   | + | + | + | + | + | + | + | + | + | + | + | + |
| <i>fliS</i>   | + | + | + | + | + | + | + | + | + | + | + | + |
| <i>flgH</i>   | + | + | + | + | + | + | + | + | + | + | + | + |
| <i>fliP</i>   | + | + | + | + | + | + | + | + | + | + | + | + |
| <i>flhA</i>   | + | + | + | + | + | + | + | + | + | + | + | + |
| <i>flhA</i>   | + | + | + | + | + | + | + | + | + | + | + | + |
| <i>flgR</i>   | + | + | + | + | + | + | + | + | + | + | + | + |
| <i>flgR</i>   | + | + | + | + | + | + | + | + | + | + | + | + |
| <i>flgI</i>   | + | + | + | + | + | + | + | + | + | + | + | + |
| <i>flgI</i>   | + | + | + | + | + | + | + | + | + | + | + | + |
| <i>cdtB</i>   | + | + | + | + | + | + | + | + | + | + | + | + |
| <i>pseB</i>   | + | + | + | + | + | + | + | + | + | + | + | + |
| <i>pseB</i>   | + | + | + | + | + | + | + | + | + | + | + | + |
| <i>pglC</i>   | + | + | + | + | + | + | + | + | + | + | + | + |
| <i>pglC</i>   | + | + | + | + | + | + | + | + | + | + | + | + |
| <i>pglC</i>   | + | + | + | + | + | + | + | + | + | + | + | + |
| <i>gmhA</i>   | + | + | + | + | + | + | + | + | + | + | + | + |
| <i>kpsF</i>   | + | + | + | + | + | + | + | + | + | + | + | + |
| <i>kpsD</i>   | + | + | + | + | + | + | + | + | + | + | + | + |
| <i>kpsE</i>   | + | + | + | + | + | + | + | + | + | + | + | + |
| <i>kpsT</i>   | + | + | + | + | + | + | + | + | + | + | + | + |
| <i>gmhA-1</i> | + | + | + | + | + | + | + | + | + | + | + | + |
| <i>waaD</i>   | + | + | + | + | + | + | + | + | + | + | + | + |
| <i>fliM</i>   | + | + | + | + | + | + | + | + | + | + | + | + |
| <i>fliA</i>   | + | + | + | + | + | + | + | + | + | + | + | + |
| <i>fliG</i>   | + | + | + | + | + | + | + | + | + | + | + | + |
| <i>fliE</i>   | + | + | + | + | + | + | + | + | + | + | + | + |
| <i>flgC</i>   | + | + | + | + | + | + | + | + | + | + | + | + |
| <i>fliS</i>   | + | + | + | + | + | + | + | + | + | + | + | + |
| <i>flgH</i>   | + | + | + | + | + | + | + | + | + | + | + | + |
| <i>flgG</i>   | + | + | + | + | + | + | + | + | + | + | + | + |
| <i>fliP</i>   | + | + | + | + | + | + | + | + | + | + | + | + |
| <i>flhA</i>   | + | + | + | + | + | + | + | + | + | + | + | + |
| <i>flgR</i>   | + | + | + | + | + | + | + | + | + | + | + | + |
| <i>flaA</i>   | + | + | + | + | + | + | + | + | + | + | + | + |
| <i>flgI</i>   | + | + | + | + | + | + | + | + | + | + | + | + |
| <i>fliQ</i>   | + | + | + | + | + | + | + | + | + | + | + | + |
| <i>pseB</i>   | + | + | + | + | + | + | + | + | + | + | + | + |
| <i>pglC</i>   | + | + | + | + | + | + | + | + | + | + | + | + |
| <i>kpsF</i>   | + | + | + | + | + | + | + | + | + | + | + | + |

|                      |   |   |   |   |   |   |   |   |   |   |   |
|----------------------|---|---|---|---|---|---|---|---|---|---|---|
| <i>gmhA-1</i>        | + | + | + | + | + | + | + | + | + | + | + |
| <i>waaD</i>          | + | + | + | + | + | + | + | + | + | + | + |
| <i>flgC</i>          | + | + | + | + | + | + | + | + | + | + | + |
| <i>fliS</i>          | + | + | + | + | + | + | + | + | + | + | + |
| <i>flhA</i>          | + | + | + | + | + | + | + | + | + | + | + |
| <i>flgR</i>          | + | + | + | + | + | + | + | + | + | + | + |
| <i>cdtB</i>          | + | + | + | + | + | + | + | + | + | + | + |
| <i>pseB</i>          | + | + | + | + | + | + | + | + | + | + | + |
| <i>chuZ</i>          | + | + | + | + | + | + | + | + | + | + | + |
| <i>fliI</i>          | + | + | + | + | - | + | + | + | + | + | + |
| <i>Cj0371</i>        | + | + | + | + | + | + | + | - | + | + | + |
| <i>fliI</i>          | + | + | + | + | - | + | + | + | + | + | + |
| <i>fliI</i>          | + | + | + | + | - | + | + | + | + | + | + |
| <i>pglE</i>          | + | + | + | + | - | + | + | + | + | + | + |
| <i>pglE</i>          | + | + | + | + | - | + | + | + | + | + | + |
| <i>fliI</i>          | + | + | + | + | - | + | + | + | + | + | + |
| <i>pglE</i>          | + | + | + | + | - | + | + | + | + | + | + |
| <i>C8J_1076</i>      | - | + | + | + | + | + | + | + | + | + | + |
| <i>pglE</i>          | + | + | + | + | - | + | + | + | + | + | + |
| <i>kpsS</i>          | - | + | + | - | + | + | + | + | + | + | + |
| <i>kpsS</i>          | - | + | + | - | + | + | + | + | + | + | + |
| <i>kpsS</i>          | - | + | + | - | + | + | + | + | + | + | + |
| <i>flaB</i>          | + | + | + | - | + | - | + | + | + | + | + |
| <i>JJD26997_1746</i> | - | + | + | - | + | + | + | + | + | + | + |
| <i>kpsS</i>          | - | + | + | - | + | + | + | + | + | + | + |
| <i>flaA</i>          | - | + | + | - | - | - | + | + | + | + | + |
| <i>pseH</i>          | - | - | + | + | - | + | - | + | + | + | + |
| <i>Cj1416c</i>       | + | + | + | - | + | + | + | - | - | - | - |
| <i>Cj1433c</i>       | - | + | - | - | - | + | - | + | + | + | + |
| <i>CJJ81176_1415</i> | + | + | + | - | + | + | + | - | - | - | - |
| <i>JJD26997_1749</i> | + | + | + | - | + | + | + | - | - | - | - |
| <i>C8J_1077</i>      | - | + | + | + | + | + | + | - | - | - | - |
| <i>C8J_1084</i>      | - | + | + | + | + | + | + | - | - | - | - |
| <i>Cj1417c</i>       | + | + | + | - | + | - | + | - | - | - | - |
| <i>Cj1419c</i>       | - | + | + | + | + | - | + | - | - | - | - |
| <i>Cj1418c</i>       | + | + | + | - | + | - | + | - | - | - | - |
| <i>CJJ81176_1417</i> | + | + | + | - | + | - | + | - | - | - | - |
| <i>CJJ81176_1418</i> | - | + | + | + | + | - | + | - | - | - | - |
| <i>JJD26997_1747</i> | + | + | + | - | + | + | - | - | - | - | - |

|                      |   |   |   |   |   |   |   |   |   |   |   |
|----------------------|---|---|---|---|---|---|---|---|---|---|---|
| <i>JJD26997_1751</i> | + | + | + | - | + | - | + | - | - | - | - |
| <i>JJD26997_1752</i> | - | + | + | + | + | - | + | - | - | - | - |
| <i>C8J_1331</i>      | - | - | - | + | - | - | - | + | + | + | + |
| <i>C8J_1344</i>      | - | - | - | - | - | + | - | + | + | + | + |
| <i>C8J_1345</i>      | - | - | - | - | - | + | - | + | + | + | + |
| <i>C8J_1346</i>      | - | - | - | - | - | + | - | + | + | + | + |
| <i>C8J_1079</i>      | - | + | + | + | + | - | + | - | - | - | - |
| <i>C8J_1082</i>      | - | + | - | + | + | + | + | - | - | - | - |
| <i>Cj1135</i>        | - | + | - | - | + | + | + | - | - | - | - |
| <i>virB8</i>         | - | - | - | - | - | - | - | + | + | + | + |
| <i>virB10</i>        | - | - | - | - | - | - | - | + | + | + | + |
| <i>virB11</i>        | - | - | - | - | - | - | - | + | + | + | + |
| <i>cysC</i>          | - | + | + | - | + | - | + | - | - | - | - |
| <i>CJJ81176_1414</i> | - | + | + | - | + | - | + | - | - | - | - |
| <i>CJJ81176_1416</i> | - | + | + | - | + | - | + | - | - | - | - |
| <i>CJE1277</i>       | - | + | - | - | + | + | + | - | - | - | - |
| <i>CJJ81176_1152</i> | - | + | - | - | + | + | + | - | - | - | - |
| <i>JJD26997_1748</i> | - | + | + | - | + | - | + | - | - | - | - |
| <i>JJD26997_0586</i> | - | + | - | - | + | + | + | - | - | - | - |
| <i>C8J_1340</i>      | - | - | - | - | - | - | - | + | + | + | + |
| <i>C8J_1343</i>      | - | - | - | - | - | + | - | + | + | - | + |
| <i>glf</i>           | - | - | + | - | + | - | + | - | - | - | - |
| <i>virB9</i>         | - | - | - | - | - | - | - | - | + | + | + |
| <i>virD4</i>         | - | - | - | - | - | - | - | + | + | + | - |
| <i>CJE1604</i>       | - | - | + | - | + | - | + | - | - | - | - |
| <i>CJE1605</i>       | - | - | + | - | + | - | + | - | - | - | - |
| <i>CJE1606</i>       | - | - | + | - | + | - | + | - | - | - | - |
| <i>C8J_1348</i>      | - | - | - | - | - | - | - | + | + | - | + |
| <i>flaB</i>          | - | - | - | + | - | + | - | - | - | - | - |
| <i>flaA</i>          | + | - | - | + | - | - | - | - | - | - | - |
| <i>rfbC</i>          | + | - | - | + | - | - | - | - | - | - | - |
| <i>CJJ81176_1430</i> | + | - | - | + | - | - | - | - | - | - | - |
| <i>C8J_1093</i>      | - | - | - | - | + | - | + | - | - | - | - |
| <i>hddC</i>          | + | - | - | - | - | - | - | - | - | - | - |
| <i>hddA</i>          | + | - | - | - | - | - | - | - | - | - | - |
| <i>fcl</i>           | + | - | - | - | - | - | - | - | - | - | - |
| <i>virB4</i>         | - | - | - | - | - | - | - | - | - | + | - |
| <i>Cj1420c</i>       | - | + | - | - | - | - | - | - | - | - | - |

|                                 |   |   |   |   |   |   |   |   |   |   |   |   |
|---------------------------------|---|---|---|---|---|---|---|---|---|---|---|---|
| <i>Cj1442c</i>                  | - | - | - | + | - | - | - | - | - | - | - | - |
| <i>kpsC</i>                     | - | - | - | + | - | - | - | - | - | - | - | - |
| <i>kpsC</i>                     | + | - | - | - | - | - | - | - | - | - | - | - |
| <i>CJE1607</i>                  | - | - | + | - | - | - | - | - | - | - | - | - |
| <i>CJJ81176_1</i><br><i>419</i> | - | + | - | - | - | - | - | - | - | - | - | - |
| <i>CJE1608</i>                  | + | - | - | - | - | - | - | - | - | - | - | - |
| <i>CJE1610</i>                  | + | - | - | - | - | - | - | - | - | - | - | - |
| <i>CJJ81176_1</i><br><i>422</i> | + | - | - | - | - | - | - | - | - | - | - | - |
| <i>wcbK</i>                     | + | - | - | - | - | - | - | - | - | - | - | - |
| <i>fcl</i>                      | + | - | - | - | - | - | - | - | - | - | - | - |
| <i>CJJ81176_1</i><br><i>424</i> | + | - | - | - | - | - | - | - | - | - | - | - |
| <i>wcbK</i>                     | + | - | - | - | - | - | - | - | - | - | - | - |
| <i>fcl</i>                      | + | - | - | - | - | - | - | - | - | - | - | - |
| <i>CJJ81176_1</i><br><i>428</i> | + | - | - | - | - | - | - | - | - | - | - | - |
| <i>CJJ81176_1</i><br><i>436</i> | - | - | - | + | - | - | - | - | - | - | - | - |
| <i>JJD26997_</i><br><i>1750</i> | - | - | - | - | - | - | + | - | - | - | - | - |
| <i>JJD26997_</i><br><i>1753</i> | - | + | - | - | - | - | - | - | - | - | - | - |
| <i>JJD26997_</i><br><i>1755</i> | + | - | - | - | - | - | - | - | - | - | - | - |
| <i>JJD26997_</i><br><i>1759</i> | + | - | - | - | - | - | - | - | - | - | - | - |
| <i>JJD26997_</i><br><i>1763</i> | + | - | - | - | - | - | - | - | - | - | - | - |
| <i>JJD26997_</i><br><i>1764</i> | + | - | - | - | - | - | - | - | - | - | - | - |
| <i>JJD26997_</i><br><i>1765</i> | + | - | - | - | - | - | - | - | - | - | - | - |
| <i>C8J_1080</i>                 | - | - | - | - | - | + | - | - | - | - | - | - |
| <i>C8J_1081</i>                 | - | - | + | - | - | - | - | - | - | - | - | - |

**Supplementary table 4:** List of putative prophage regions identified in broiler and free range chicken isolates of *H. pullorum* with their major functions

| Strain     | Region | Length (kb) | Status     | CDS | Possible Phage                                             | Major Functions                                                                                                                    |
|------------|--------|-------------|------------|-----|------------------------------------------------------------|------------------------------------------------------------------------------------------------------------------------------------|
| NAP1<br>W4 | 1      | 10.7        | Incomplete | 6   | Cafete_BV_PW1<br>_NC_014637                                | Putative exodeoxyribonuclease<br>-VII large subunit,<br>hypothetical proteins                                                      |
|            | 2      | 9           | Incomplete | 7   | Ostreo_tauri_vir<br>us_1_NC_01328<br>8                     | 2-methylthioadenine<br>synthetase, ATP-dependent<br>metalloprotease, conserved<br>archaeal viral protein,<br>hypothetical proteins |
|            | 3      | 8           | Incomplete | 9   | Cronob_vB_Csa<br>M_GAP32_NC_<br>019401                     | Amidophosphoribosyltransfera<br>-se, Isochorismatase hydrolase,<br>hypothetical protein                                            |
|            | 4      | 5.6         | Incomplete | 7   | Caulob_Cr30_N<br>C_025422                                  | GDP-D-mannose dehydratase,<br>D,D-heptose 7-phosphate<br>kinase, hypothetical proteins                                             |
| NAP2<br>W5 | 1      | 10.7        | Incomplete | 6   | Cafete_BV_PW1<br>_NC_014637,                               | Ribonucleotide reductase,<br>hypothetical proteins                                                                                 |
|            | 2      | 9.8         | Incomplete | 12  | Aureoc_anophag<br>efferens_virus_<br>MM_2014_NC_<br>024697 | putative glycosyltransferase,<br>hypothetical proteins                                                                             |
|            | 3      | 8.4         | Incomplete | 6   | Cronob_vB_Csa<br>M_GAP32_NC_<br>019401                     | Peptide deformylase,<br>hypothetical proteins                                                                                      |
|            | 4      | 10          | Incomplete | 9   | Ostreo_tauri_vir<br>us_1_NC_01328<br>8                     | 2-methylthioadenine<br>synthetase, hypothetical<br>proteins                                                                        |
|            | 5      | 11.6        | Incomplete | 13  | Cronob_vB_Csa<br>M_GAP32_NC_<br>019401                     | Isochorismatase hydrolase,<br>putative ELP-3 histone acetyl-<br>transferase, hypothetical<br>proteins                              |
|            | 6      | 9.5         | Incomplete | 11  | Aureoc_anophag<br>efferens_virus_<br>MM_2014_NC_<br>024697 | UDP-N-acetylglucosamine-2-<br>epimerase, hypothetical<br>proteins                                                                  |
|            | 7      | 10.2        | Incomplete | 13  | Aureoc_anophag<br>efferens_virus_                          | Capsular polysaccharide-<br>biosynthesis protein, 3,4-                                                                             |



|          |   |      |            |    |                                                 |                                                                                                                                                      |
|----------|---|------|------------|----|-------------------------------------------------|------------------------------------------------------------------------------------------------------------------------------------------------------|
|          |   |      |            |    | MM_2014_NC_024697                               | dihydroxy-2-butanone 4-phosphate synthase                                                                                                            |
|          | 8 | 10.4 | Incomplete | 14 | Aureoc_anophag efferens_virus_MM_2014_NC_024697 | Hypothetical proteins                                                                                                                                |
|          | 9 | 6.3  | Incomplete | 10 | Aureoc_anophag efferens_virus_MM_2014_NC_024697 | AAA+ family ATPase, hypothetical proteins                                                                                                            |
| NAP3 W17 | 1 | 10   | Incomplete | 9  | Acinet_Acj61_NC_014661                          | Aspartate aminotransferase, 2-methylthioadenine synthetase, ATP-dependent metalloprotease                                                            |
|          | 2 | 10.8 | Incomplete | 7  | Cafete_BV_PW1_NC_014637                         | Putative exodeoxyribonuclease -VII large subunit, hypothetical proteins                                                                              |
|          | 3 | 8    | Incomplete | 9  | Cronob_vB_CsaM_GAP32_NC_019401                  | Dihydrodipicolinate reductase, Isochorismatase hydrolase                                                                                             |
| NAP5 W19 | 1 | 10   | Incomplete | 10 | Ostreo_tauri_virus_1_NC_013288                  | Aspartate aminotransferase, ATP-dependent metalloprotease, hypothetical proteins                                                                     |
|          | 2 | 10.8 | Incomplete | 6  | Cafete_BV_PW1_NC_014637                         | Ribonucleotide reductase, putative exodeoxyribonuclease-VII large subunit, hypothetical proteins                                                     |
|          | 3 | 12.1 | Incomplete | 13 | Cronob_vB_CsaM_GAP32_NC_019401                  | Putative minor tail protein, isochorismatase hydrolase, amidophosphoribosyltransferase, hypothetical proteins                                        |
|          | 4 | 8.9  | Incomplete | 10 | Entero_phi92_NC_023693                          | Lipopolysaccharide- -1,3 galactosyltransferase, ADP-L-glycero-D-mannoheptose-6-epimerase, 2 dehydro-3-deoxyglucarate aldolase, hypothetical proteins |

|             |   |      |            |    |                                      |                                                                                                                                                  |
|-------------|---|------|------------|----|--------------------------------------|--------------------------------------------------------------------------------------------------------------------------------------------------|
| NAP6<br>W24 | 1 | 10   | Incomplete | 11 | Ostreo_tauri_virus_1_NC_013288       | ATP-dependent metalloprotease, 2-methylthioadenine synthetase, aspartate aminotransferase, hypothetical proteins                                 |
|             | 2 | 15.8 | Incomplete | 9  | Aeromo_25_NC_008208                  | Group 1 glycosyl transferase, UDP-galactopyranose mutase, hypothetical proteins                                                                  |
|             | 3 | 10.8 | Incomplete | 6  | Cafete_BV_PW1_NC_014637              | Putative exodeoxyribonuclease VII-large subunit, ribonucleotide reductase, hypothetical proteins                                                 |
|             | 4 | 11.5 | Incomplete | 13 | Cronob_vB_CsaM_GAP32_NC_019401       | Membrane-bound metalloprotease, isochorismatase hydrolase, putative ELP-3 histone acetyltransferase, hypothetical proteins                       |
| NAP8<br>W25 | 1 | 10   | Incomplete | 9  | Ostreo_tauri_virus_1_NC_013288       | Aspartate aminotransferase, quaternary ammonium transporter-2-methylthioadenine synthetase, ATP-dependent metalloprotease, hypothetical proteins |
|             | 2 | 8    | Incomplete | 9  | Cronob_vB_CsaM_GAP32_NC_019401       | Dihydrodipicolinate reductase, putative ELP-3 histone acetyltransferase, isochorismatase hydrolase, hypothetical proteins                        |
|             | 3 | 10.9 | Incomplete | 12 | Bathyc_BpV1_NC_014765                | putative glycosyltransferase hypothetical proteins                                                                                               |
| NAP10<br>B8 | 1 | 10   | Incomplete | 10 | Ostreo_tauri_virus_1_NC_013288       | ATP-dependent metalloprotease, 2-methylthioadenine synthetase, aspartate aminotransferase hypothetical proteins                                  |
|             | 2 | 10.9 | Incomplete | 7  | Cafete_BV_PW1_NC_014637              | Putative exodeoxyribonuclease-VII large subunit, hypothetical proteins                                                                           |
|             | 3 | 6.5  | Incomplete | 8  | Ectoca_siliculosus_virus_1_NC_002687 | Putative lysozyme-peptidase ABC transporter, putative lysozyme-peptidase, hypothetical proteins                                                  |

|              |   |      |            |    |                                        |                                                                                                                                                                                                 |
|--------------|---|------|------------|----|----------------------------------------|-------------------------------------------------------------------------------------------------------------------------------------------------------------------------------------------------|
|              | 4 | 8    | Incomplete | 9  | Cronob_vB_Csa<br>M_GAP32_NC_<br>019401 | Isochorismatase hydrolase,<br>putative ELP-3 histone acetyl<br>transferase,<br>amidophosphoribosyltransfera-<br>se,<br>hypothetical proteins                                                    |
| NAP11<br>B31 | 1 | 8.7  | Intact     | 18 | Stenot_Smp131_<br>NC_023588            | Type VI secretion protein,<br>baseplate assembly protein J,<br>TP901 family tail tape<br>measure protein, hypothetical<br>proteins                                                              |
|              | 2 | 24.8 | Incomplete | 11 | Entero_P4_NC_<br>001609                | Integrase, molybdenum ABC<br>transporter permease, putative<br>methyltransferase<br>endonuclease, hypothetical<br>proteins                                                                      |
| NAP12<br>B32 | 1 | 10   | Incomplete | 10 | Ostreo_tauri_vir<br>us_1_NC_01328<br>8 | ATP-dependent<br>metalloprotease,<br>quaternary ammonium<br>transporter, aspartate<br>aminotransferase, hypothetical<br>proteins                                                                |
|              | 2 | 10.8 | Incomplete | 6  | Cafete_BV_PW1<br>_NC_014637            | Ribonucleotide reductase,<br>putative exodeoxyribonuclease<br>VII large subunit, hypothetical<br>proteins                                                                                       |
|              | 3 | 8    | Incomplete | 9  | Cronob_vB_Csa<br>M_GAP32_NC_<br>019401 | Amidophosphoribosyltransfera-<br>se, putative ELP-3 histone<br>acetyl transferase,<br>isochorismatase hydrolase,<br>hypothetical proteins                                                       |
|              | 4 | 15.7 | Incomplete | 9  | Synech_S_SSM7<br>_NC_015287            | UDP-glucose dehydrogenase,<br>long tail fiber proximal subunit<br>1, hypothetical proteins                                                                                                      |
|              | 5 | 6.4  | Intact     | 12 | Escher_ep3_NC<br>_025430               | Tail protein X, baseplate<br>assembly protein J, phage tail<br>protein, TP901 family tail tape<br>measure protein, putative<br>cytosine-specific<br>methyltransferase,<br>hypothetical proteins |

|              |   |      |            |    |                                        |                                                                                                                                                                                |
|--------------|---|------|------------|----|----------------------------------------|--------------------------------------------------------------------------------------------------------------------------------------------------------------------------------|
| NAP13<br>B35 | 1 | 8.3  | Incomplete | 6  | Cronob_vB_Csa<br>M_GAP32_NC_<br>019401 | Lytic transglycosylase, peptide<br>deformylase, hypothetical<br>proteins                                                                                                       |
|              | 2 | 8    | Incomplete | 9  | Cronob_vB_Csa<br>M_GAP32_NC_<br>019401 | Isochorismatase hydrolase,<br>putative ELP-3 histone acetyl<br>transferase, hypothetical<br>proteins                                                                           |
|              | 3 | 10   | Incomplete | 10 | Ostreo_tauri_vir<br>us_1_NC_01328<br>8 | ATP-dependent<br>metalloprotease,<br>aspartate aminotransferase,<br>hypothetical proteins                                                                                      |
|              | 4 | 10.8 | Incomplete | 6  | Cafete_BV_PW1<br>_NC_014637            | Putative exodeoxyribonuclease<br>VII large subunit, hypothetical<br>proteins                                                                                                   |
|              | 5 | 7.7  | Intact     | 15 | Escher_ep3_NC<br>_025430               | Tail protein X, baseplate<br>assembly protein J, TP901<br>family tail tape measure<br>protein, phage tail tape<br>measure protein, hypothetical<br>proteins                    |
| NAP14<br>B36 | 1 | 19.8 | Intact     | 24 | Escher_ep3_NC<br>_025430               | DNA-binding protein, putative<br>DNA topoisomerase, baseplate<br>assembly protein, TP901<br>family tail tape measure<br>protein, putative thioredoxin<br>hypothetical proteins |

**Supplementary table 5:** Summary of genomic islands identified in 11 whole genome sequences of *H. pullorum* isolates

| Strains  | Genomic Islands | Start      | End       | Size (bp) | Important Genes                                                                                                              |
|----------|-----------------|------------|-----------|-----------|------------------------------------------------------------------------------------------------------------------------------|
| NAP1W4   | 1               | 1,614, 230 | 1,618,832 | 4,602     | Adenine-specific methyltransferase                                                                                           |
|          | 2               | 1,644, 789 | 1,672,156 | 27,367    | Major outer membrane protein, Capsular polysaccharide synthesis enzyme CAP51                                                 |
|          | 3               | 1,785, 638 | 1,791,113 | 5,475     | N-acetylneuraminate cytidyltransferase                                                                                       |
|          | 4               | 2,000, 382 | 2,006,618 | 6,236     | IncP-type DNA relaxase Tral, Chromosome partitioning protein Par A                                                           |
| NAP5W19  | 1               | 1,713, 479 | 1,756,221 | 42,742    | Haemin uptake system outer membrane receptor, Capsular polysaccharide biosynthesis heptosyltransferase HddD                  |
| NAP8W25  | 1               | 821,216    | 835, 141  | 13,925    | Transposase, IcmF-related protein, VgrG protein                                                                              |
| NAP11B31 | 1               | 1,688,118  | 1,746,692 | 58,574    | Type IV secretion/competence protein (VirB10), Type II/IV secretion system ATP hydrolase TadA, VirB11, CpaF, Tad A subfamily |

|          |   |           |           |        |                                                                                                             |
|----------|---|-----------|-----------|--------|-------------------------------------------------------------------------------------------------------------|
|          | 2 | 1,876,686 | 1,940,547 | 63,861 | DNA transformation competency, Abortive infection protein                                                   |
| NAP12B32 | 1 | 1,658,189 | 1,695,288 | 37,099 | Putative regulator of late gene expression, Thernonuclease family protein                                   |
|          | 2 | 1,812,073 | 1,858,266 | 46,193 | Type VI secretion lipoprotein/ VasD, Single stranded DNA binding protein, hcp protein                       |
| NAP13B35 | 1 | 1,753,270 | 1,763,215 | 9,945  | Type VI secretion lipoprotein / VasD, Uncharacterized protein ImpJ/Vas E,                                   |
|          | 2 | 1,870,419 | 1,902,747 | 32,328 | Protein ImpG / VasA, UDP-glucose 4-epimerase                                                                |
| NAP14B36 | 1 | 1,628,176 | 1,695,844 | 67,668 | Protein ImpG / VasA, Plasmid partitioning protein Par A                                                     |
|          | 2 | 1,871,624 | 1,885,705 | 14,081 | Type IV secretion / competence protein (VirB9), Type II/IV secretion system ATP hydrolase, Signal peptidase |
